# Supplementary material for: Design, Synthesis and Evaluation of Hesperetin Derivatives as Potential Multifunctional Anti-Alzheimer Agents
Source: MDPI journal article supplement (doi:10.3390/molecules22071067), 2017-06-26
Supplement: s1 [file s1]

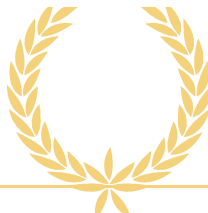

We certify that the following article

## Design, Synthesis, and Evaluation of Hesperetin Derivatives as Potential Multifunctional anti-Alzheimer Agents

Jun Li

has undergone English language editing by MDPI. The text has been checked for correct use of grammar and common technical terms, and edited to a level suitable for reporting research in a scholarly journal.

MDPI uses experienced, native English speaking editors. Full details of the editing service can be found at

► [www.mdpi.com/authors/english](http://www.mdpi.com/authors/english).

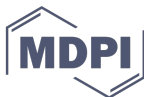

Multidisciplinary  
Digital Publishing  
Institute

Basel, June 2017

A handwritten signature in blue ink, consisting of a series of loops and a long horizontal stroke.

Martyn Rittman, Ph.D.  
English Editing Manager
